# Supplementary material for: The transcriptional repressor Blimp1 is expressed in rare luminal progenitors and is essential for mammary gland development
Source: Oxford University Press journal article supplement (doi:10.1242/dev.136358), 2016-05-15
Supplement: dev136358supp.pdf [file dev136358supp.pdf]

## SUPPLEMENTARY FIGURES

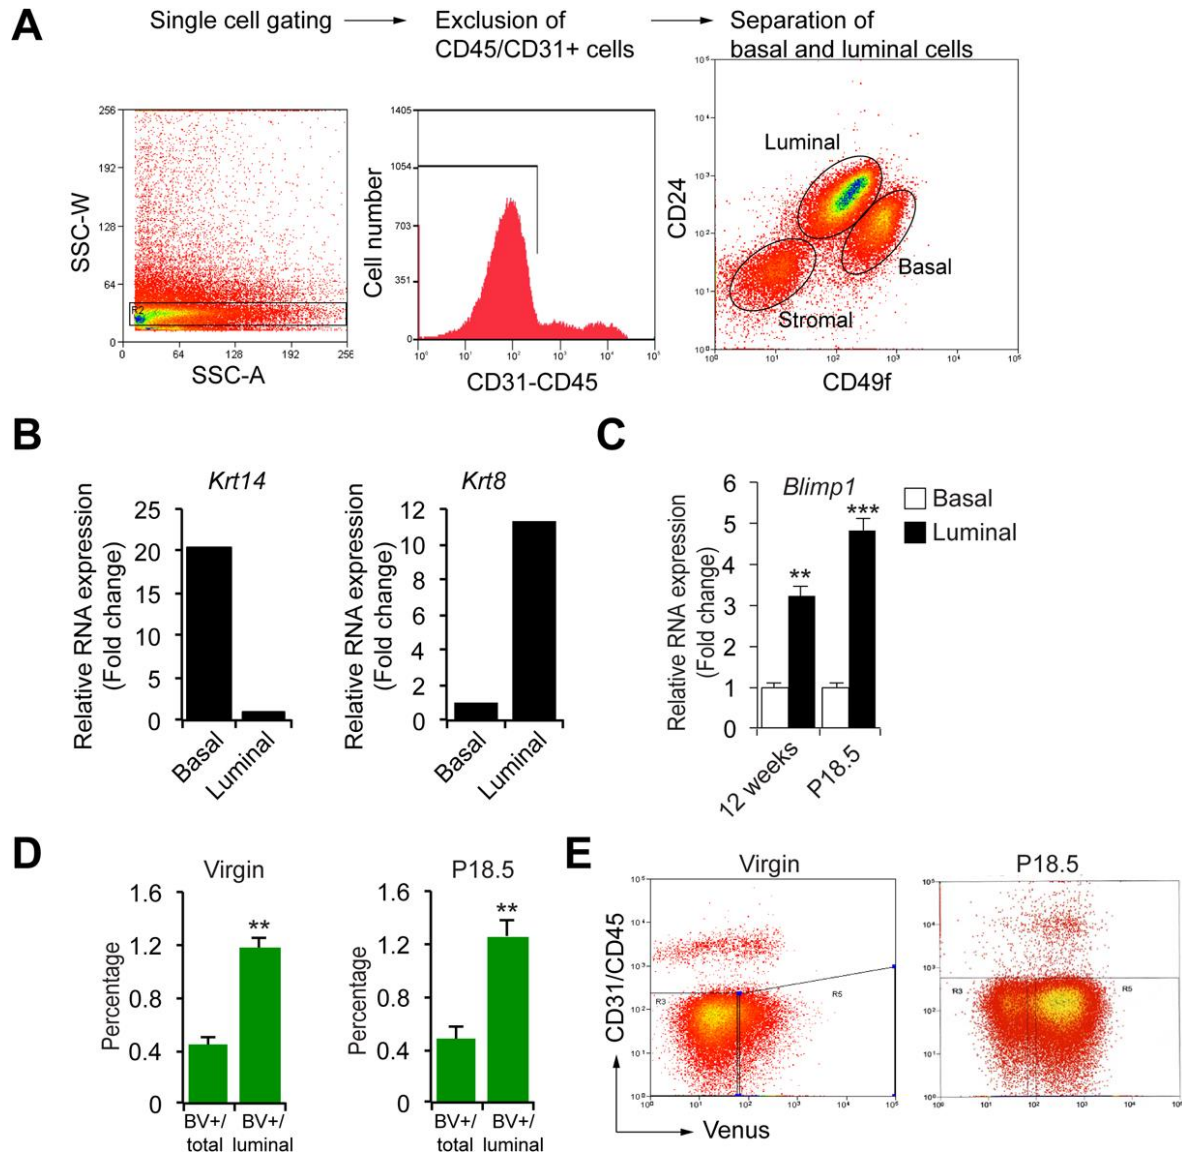

**Fig. S1. Characterization of Blimp1-expressing cells using flow cytometry.** (A) Gating cascade: samples were gated on forward and side scatter (FSC/SSC) to exclude debris, and single cells were isolated using time-of-flight analysis on both FSC and SSC. CD45<sup>+</sup> leukocytes and CD31<sup>+</sup> endothelial cells were removed and total epithelial cells gated on a CD24/CD49f plot. Epithelial subpopulations were isolated from the total epithelial cell

population. (B) qRT-PCR analysis of *Krt14* and *Krt18* expression in basal (CD31<sup>-</sup>/CD45<sup>-</sup> / CD24<sup>+</sup>/CD49f<sup>high</sup>) and luminal (CD31<sup>-</sup>/CD45<sup>-</sup>/CD24<sup>+</sup>/CD49f<sup>low</sup>) cell populations isolated from 12-week virgin control mammary glands. Data are presented as mean  $\pm$  s.e.m values from n=2 independent experiments. (C) qRT-PCR analysis of Blimp1 mRNA in basal *versus* luminal mammary epithelial cells isolated from 12-week virgins and P18.5 mice. qRT-PCR values were normalized to *Hprt* expression. Data are presented as mean  $\pm$  s.e.m values from n=2 independent experiments, and confirm that Blimp1 is restricted to luminal cells. (D) Histograms showing the percentages of BV<sup>+</sup> luminal cell relative to gated total or luminal cells isolated from 12-week virgin or P18.5 mammary glands. Data are presented as mean  $\pm$  s.e.m values from n=2 independent experiments. Error bars, s.e.m. \*\*  $p < 0.01$ . (E) Representative dot plots showing an enrichment of BV<sup>+</sup> cells within the luminal population from 12-week virgin and P18.5 mammary glands.

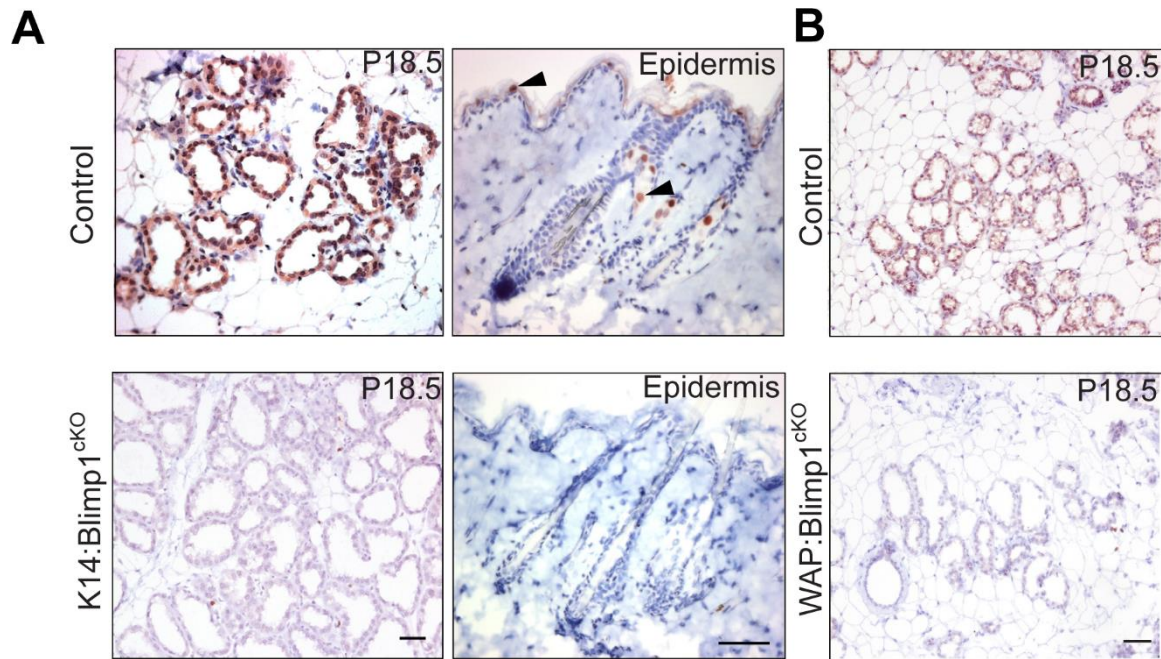

**Fig. S2. Efficacy of Cre-mediated of Blimp1 deletion from mammary gland epithelia.** (A and B) Immunostaining of mammary glands (P18.5) and epidermis from K14:Blimp1<sup>ckO</sup> and WAP:Blimp1<sup>ckO</sup> and littermate control mice (representative of n=3 mice of each genotype). Blimp1 protein was not detected in mammary epithelia of either K14:Blimp1<sup>ckO</sup> or WAP:Blimp1<sup>ckO</sup> tissue. Images representative of n=3 mice of each genotype. Arrowheads indicate Blimp1<sup>+</sup> cells in the hair follicle (sebocytes) and in the granular layer of the epidermis. Scale bars, 50μm.

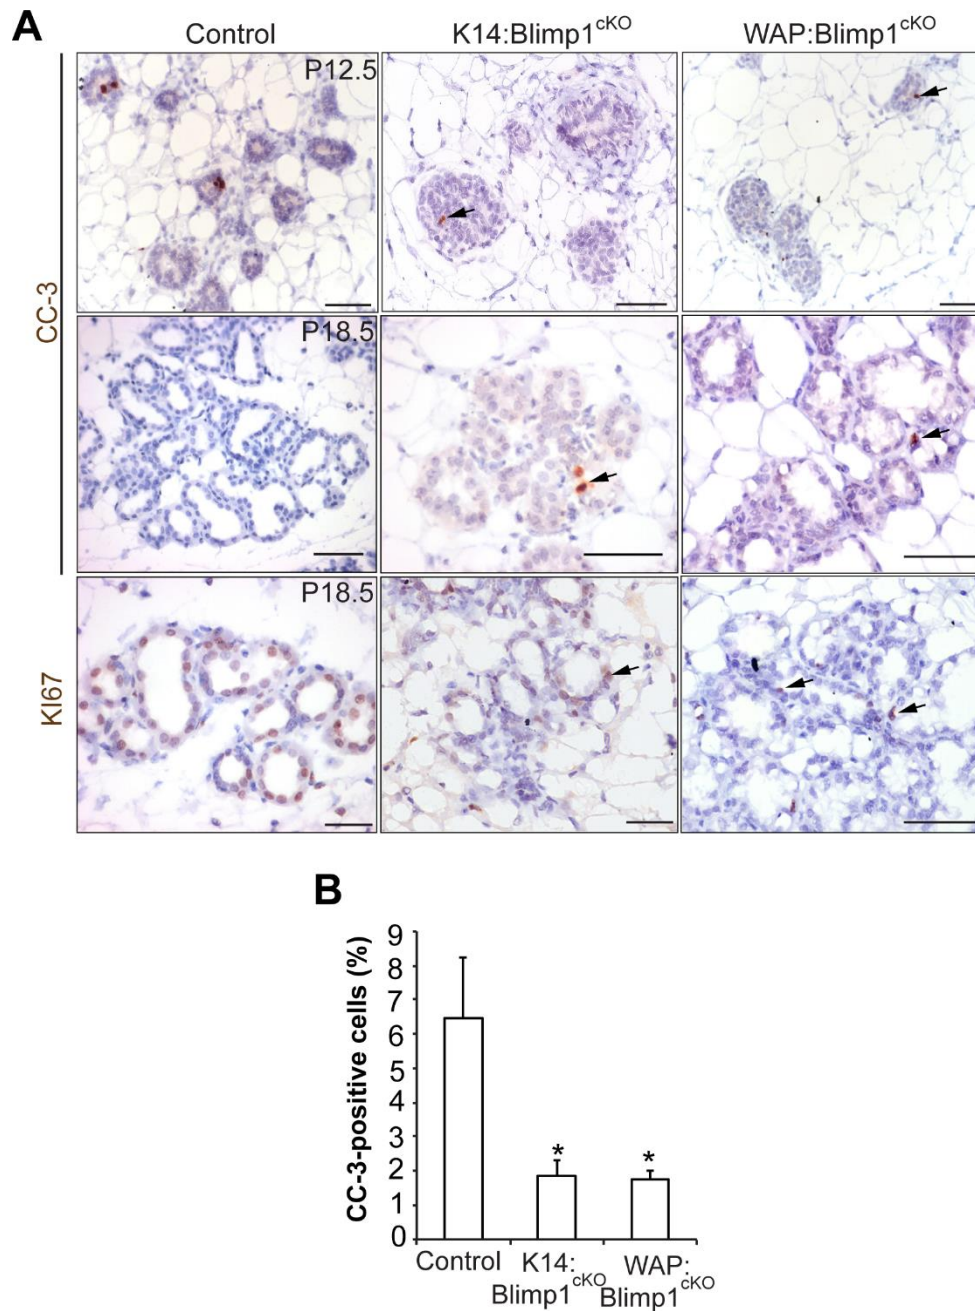

**Fig. S3. Loss of Blimp1 alters lumen formation during pregnancy.** (A and B) Immunostaining of Blimp1 mutant mammary glands and littermate controls for CC-3 and KI67 at P12.5 and P18.5 (representative images from n=3 mice of each genotype). Immunostaining shows a reduction in the number of CC-3<sup>+</sup> cells (arrow) at P12.5 mutant mammary glands. Data are presented as mean  $\pm$  s.e.m values from n=3 mice of each genotype. Error bars represent s.e.m values. \*  $p < 0.05$ . CC-3<sup>+</sup> cells (arrow) were detected in mutant mammary epithelia at P18.5, while markedly reduced levels of KI67<sup>+</sup> cells (arrow) were observed in mutant alveoli (representative images from n=3 mice of each genotype). All scale bars, 50 $\mu$ m.



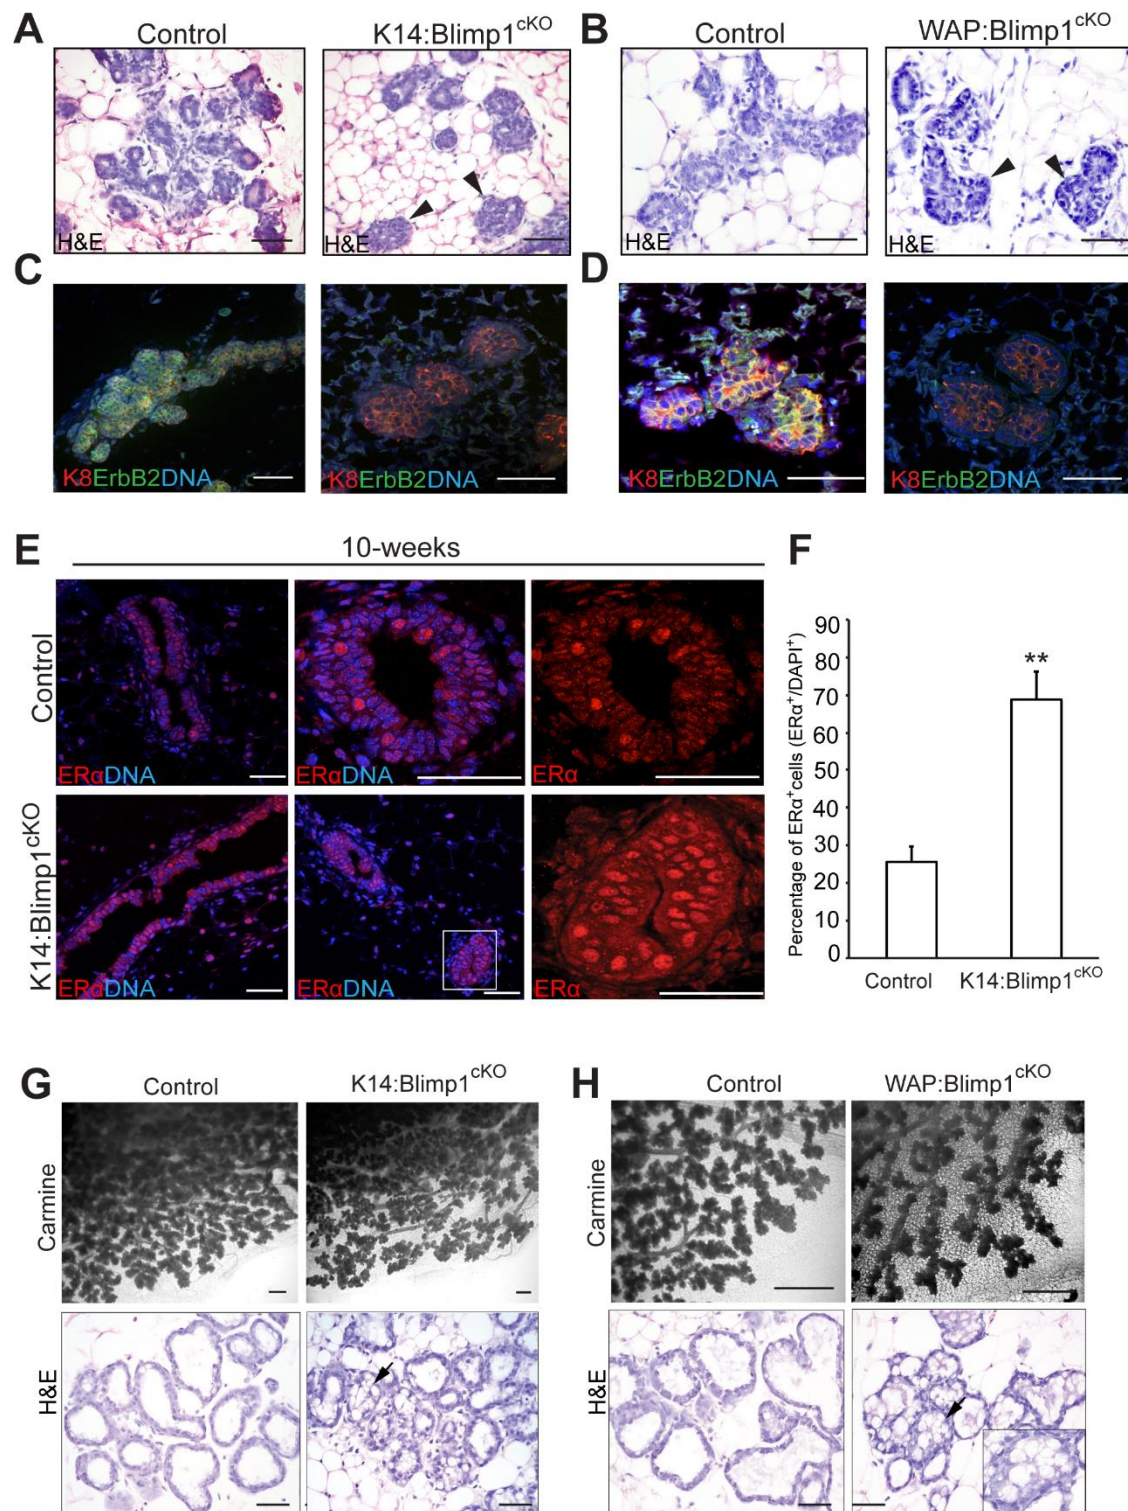

**Figure S4. Loss of Blimp1 severely impacts lobuloalveolar development.** (A and B) Histological sections of mammary glands at P12.5 from K14:Blimp1<sup>ckO</sup>, WAP:Blimp1<sup>ckO</sup> and littermate control mice. Arrowheads indicate collapsed alveoli in mutant mammary

epithelia (representative images from n=3 mice of each genotype). (C and D) Immunofluorescence staining for K8 (red) and ErbB2 (green). (E) Increased number of ER $\alpha$ <sup>+</sup> cells observed in 10-week-old mutant mammary epithelia (images representative of n=3 mice of each genotype). (F) Histograms showing the percentages of ER $\alpha$ <sup>+</sup> at 10 weeks of age in control and mutant mammary epithelia's. Data are presented as mean  $\pm$  s.e.m values from n=3 independent experiments. (G and H) Whole mount carmine staining and histological sections from P18.5 K14:Blimp1<sup>ckO</sup>, WAP:Blimp1<sup>ckO</sup> and control littermate mammary glands (representative images from n=3 mice of each genotype). Arrows indicate disorganized and vacuolated alveoli in Blimp1 mutant mammary glands. \*\* $p < 0.01$ . All scale bars, 50  $\mu$ m.

**Table S1: List of Antibodies**

| Antibody                          | Supplier                 | Cat No    | Host Species          | Dilution  | Application |
|-----------------------------------|--------------------------|-----------|-----------------------|-----------|-------------|
| anti-Cleaved-Caspase-3            | Cell Signaling           | 9664      | Rabbit polyclonal     | 1 in 100  | IHC         |
| anti- $\beta$ -casein             | Santa Cruz Biotechnology | sc-30042  | Rabbit polyclonal     | 1 in 100  | IF          |
| anti-Blimp-1                      | Santa Cruz Biotechnology | sc-130917 | Rat monoclonal        | 1 in 500  | IHC/IF/ICC  |
| anti-BrdU                         | Becton Dickinson         | 347580    | mouse monoclonal      | 1 in 100  | IF          |
| anti-CD24-PerCP-Cy5.5 clone M1/69 | BD Pharmingen            | 562360    | Rat monoclonal        | 1 in 200  | FACS        |
| anti-CD31-APC clone MEC13.3       | BD Pharmingen            | 551262    | Rat monoclonal        | 1 in 200  | FACS        |
| anti-CD45-APC clone 30-F11        | BD Pharmingen            | 559864    | Rat monoclonal        | 1 in 200  | FACS        |
| anti-CD49f-PE clone GoH3          | BD Pharmingen            | 561894    | Rat monoclonal        | 1 in 50   | FACS        |
| anti-Elf5                         | Santa Cruz Biotechnology | sc-9645   | Goat polyclonal       | 1 in 100  | IF          |
| anti-ErbB2                        | Abcam                    | ab2428    | Rabbit polyclonal     | 1 in 100  | IF          |
| anti-ER $\alpha$                  | Santa Cruz Biotechnology | sc-542    | Rabbit polyclonal     | 1 in 200  | IHC/IF      |
| anti-GFP-A488-conjugate           | Invitrogen/MP            | A-31851   | Rabbit polyclonal     | 1 in 400  | IF          |
| anti-GFP                          | Abcam                    | Ab13970   | chicken polyclonal    | 1 in 1000 | IF          |
| anti-Keratin 14                   | Cambridge Bioscience     | PRB-155P  | Rabbit Polyclonal     | 1 in 2000 | IF          |
| anti-Keratins 8                   | Progen Biotechnik        | GP11      | Guinea-Pig polyclonal | 1 in 50   | IF          |
| anti-Ki67                         | Abcam                    | ab15580   | Rabbit polyclonal     | 1 in 100  | IF          |
| anti-p63                          | Abcam                    | ab735     | Mouse monoclonal      | 1 in 40   | IF          |
| Phalloidin-Alexa Fluor 633        | Invitrogen/MP            | A22284    |                       | 1 in 100  | IF/ICC      |
| anti-pStat5 (Tyr694)              | Cell Signaling           | 9314      | Rabbit polyclonal     | 1 in 100  | IHC         |
| anti-WAP                          | Santa Cruz Biotechnology | sc-25526  | Rabbit polyclonal     | 1 in 100  | IF          |
| GM130                             | BD Pharmingen            | 610822    | Mouse monoclonal      | 1 in 200  | IF          |
| Par3                              | Millipore                | 07-330    | Rabbit polyclonal     | 1 in 200  | IF          |
| Podocalyxin                       | R&D systems              | MAB1556   | Rat polyclonal        | 1 in 200  | IF          |

**Table S2: List of Primers**

| Gene           | Protein                                               | Epithelial compartment | Primer sequence                                                          |
|----------------|-------------------------------------------------------|------------------------|--------------------------------------------------------------------------|
| <i>Prdm1</i>   | Blimp1                                                | Luminal                | Forward: GGCTCCACTACCCTTATCCTG;<br>Reverse: TCCTTTTGGAGGGATTGGAGTC       |
| Venus          | Yellow fluorescent protein (YFP)                      |                        | Forward: CGACTCTAGATCATAATCAGCC;<br>Reverse: TAAGATACATTGATGAGTTTGGAC    |
| <i>Elf5</i>    | E74-like factor 5 (ELF5), luminal progenitors         |                        | Forward: CCAACGCATCCTTCTGTGAC;<br>Reverse: AGGCAGGGTAGTAGTCTTCA          |
| <i>Esr1</i>    | Estrogen receptor 1 (ER1), mature luminal cells       |                        | Forward: CTGGACAGGAATCAAGGTAAA;<br>Reverse: GAGGCACACAACTCTTCTC          |
| <i>WAP</i>     | Whey acidic protein (Milk protein)                    |                        | Forward: AACATTGGTGTTCGAAAGC;<br>Reverse: GGTCGCTGGAGCATTCTATC           |
| <i>Csn2</i>    | Beta casein (Milk protein)                            |                        | Forward: TGCAGGCAGAGGATGTGCTCCAGGC;<br>Reverse: GGCCTGGGGCTGTGACTGGATGCT |
| <i>Krt8/18</i> | Cytokerain 8/18                                       |                        | Forward: CGAGGCACTCAAGGAAGAAC-;<br>Reverse: AATCTGGGCTTCCAGACCTT         |
| <i>Pgr</i>     | <i>Progestrone Receptor</i>                           |                        | Forward: CCACCTGTACTGCTTGAATAC,<br>Reverse: CAACTGGGCAGCAATAACTTC        |
| <i>Krt14</i>   | Cytokerain 14                                         | Basal                  | Forward: GCTCTTGTGGTATCGGTGGT;<br>Reverse: GAGGAGAAGCGAGAGGAGGT          |
| <i>Hprt</i>    | Hypoxanthine-guanine phosphoribosyltransferase (Hprt) |                        | Forward: GCTGGTGAAAAGGACCTCT;<br>Reverse: CACAGGACTAGAACACCTGC           |
